# Supplementary material
Source: publisher figshare collection journal article supplement (https://acs.figshare.com/ndownloader/files/13868801)
Supplement: Supplementary file 1 [file 13868801]

## Supporting information

### Pressure-induced reversible phase transitions in a new metastable phase of vanadium dioxide

Huafang Zhang,<sup>†,\*</sup> Quanjun Li,<sup>\*,†</sup> Fei Wang,<sup>†</sup> Ran Liu,<sup>†</sup> Yanli Mao,<sup>‡</sup> Zhenxian Liu,<sup>§</sup> Xiaodong Li,<sup>//</sup> Ke Yang,<sup>⊥</sup> Tian Cui,<sup>†</sup> and Bingbing Liu<sup>\*,†</sup>

<sup>†</sup>State Key Laboratory of Superhard Materials, Jilin University, Changchun 130012, China

<sup>‡</sup>School of Physics and Electronics, Henan University, Kaifeng 475004, China

<sup>§</sup>U2A Beam line, Carnegie Institution of Washington, Upton, New York 11973, United States

<sup>//</sup>Beijing Synchrotron Radiation Facility, Institute of High Energy Physics, Chinese Academy of Sciences, 100049 Beijing, China

<sup>⊥</sup>Shanghai Institute of Applied Physics, Chinese Academy of Sciences, 201204 Shanghai, China

### Synthesis of VO<sub>2</sub> (Mx') under Pressure

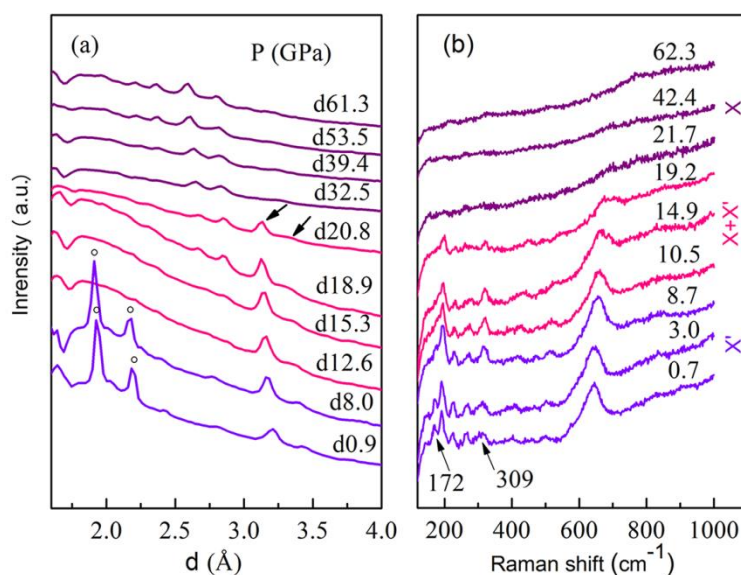

Figure S1. High-pressure (a) X-ray diffraction patterns and (b) Raman spectra of VO<sub>2</sub> collected upon decompression. Circles indicate diffraction peaks from Fe.

Figure S1 show the X-ray diffraction patterns and Raman spectra for VO<sub>2</sub> collected upon decompressed from about 61 GPa. In figure 1a, all diffraction peaks shift to larger d-spacing without any modification of the overall peak pattern above 32.5 GPa. When pressure decreased down to 20.8 GPa, new peaks at about 3.1 Å and 3.3 Å appear. This indicates that the structural transition, from the high-pressure X to a new phase (named Mx'), takes place at about 20.8 GPa. With further decreasing pressure, all the diffraction peaks of X phase gradually weakens and finally disappear at ~12.6 GPa, suggesting that all the sample transformed into the Mx'. Additional evidence of this structural phase transition is shown in Raman measurements. In figure 1b shows the selected Raman spectra measured upon releasing from 62 GPa. With decreasing pressure, we did not observe any Raman peak above 19.2 GPa, because this pressure regime (62~19 GPa)

corresponds to the stable pressure range of the metallic X phase, for which the Raman signals are too weak to detect. Upon further decompressing, Raman peaks start to appear. The intensities of these Raman peaks increase with decreasing pressure, and the Raman peak at about  $195\text{ cm}^{-1}$  gradually broadens and finally splits into two peaks below 10.5 GPa, indicating that all the  $\text{VO}_2$  samples in the X phase have transformed into the new monoclinic  $\text{Mx}'$  phase.

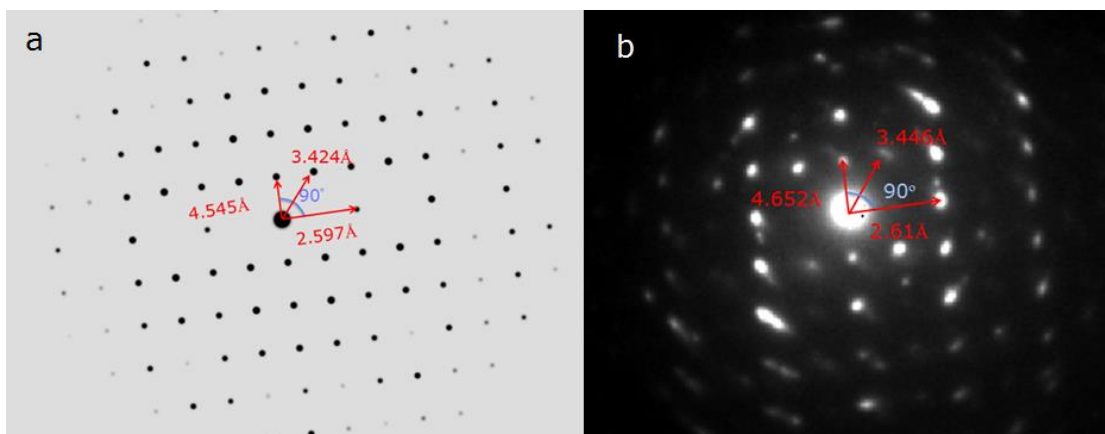

Figure S2. (a) The simulated the TEM/SAED patterns, (b) Observed diffraction pattern.

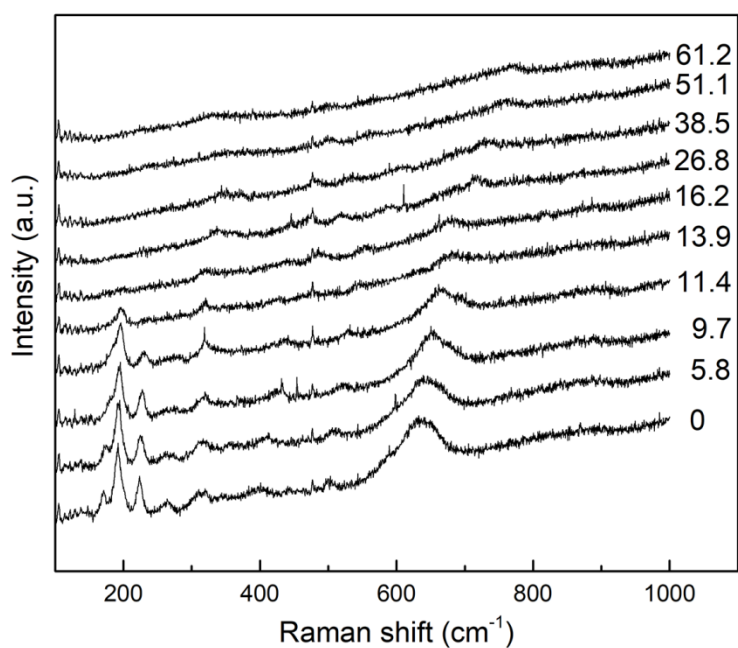

Figure S3. Raman spectra collected upon decompression.
